# Supplementary material for: FGF21 signaling in glutamatergic neurons is required for weight loss associated with dietary protein dilution
Source: PubMed Central journal article supplement (PMC7658965; doi:10.1038/s41598-020-76593-2), 2020-11-11
Supplement: 41598_2020_76593_MOESM1_ESM.pdf [file 41598_2020_76593_MOESM1_ESM.pdf]

## Supplemental Materials

### **FGF21 signaling in glutamatergic neurons is required for weight loss associated with dietary protein dilution**

Kyle H. Flippo<sup>1,2,3,\*</sup>, Sharon O. Jensen-Cody<sup>1,2,3,\*</sup>, Kristin E. Claflin<sup>1,2,3</sup>, Matthew J. Potthoff<sup>1,2,3,4,#</sup>

<sup>1</sup>Department of Neuroscience and Pharmacology, University of Iowa Carver College of Medicine, Iowa City, IA 52242, USA.

<sup>2</sup>Fraternal Order of Eagles Diabetes Research Center, University of Iowa Carver College of Medicine, Iowa City, IA 52242, USA.

<sup>3</sup>Iowa Neuroscience Institute, University of Iowa Carver College of Medicine, Iowa City, IA 52242, USA.

<sup>4</sup>Department of Veterans Affairs Medical Center, Iowa City, IA 52242, USA.

## SUPPLEMENTARY FIGURE LEGENDS

### **Supplementary Figure 1. Caloric consumption of protein and carbohydrate in food vs. fluid**

**in mice from Figure 1 and 2.** (A) Average daily total protein caloric intake (food + fluid) during 3-bottle choice of water versus either 10% or 20% sucrose and/or 4% or 18% casein in 13-week old male wild type (WT) mice receiving daily intraperitoneal (i.p.) injections of vehicle (4 days), followed by daily i.p. injections of FGF21 (1 mg/kg; 4 days), and then a washout period with no injections (3 days; n = 8/group). (B) Average daily total carbohydrate caloric intake (food + fluid) during 3-bottle choice of water versus either 10% or 20% sucrose and/or 4% or 18% casein in 13-week old male WT mice receiving daily i.p. injections of vehicle (4 days), followed by daily i.p. injections of FGF21 (1 mg/kg; 4 days), and then a washout period with no injections (3 days; n = 8/group). (C) Average daily protein caloric intake from food alone during 3-bottle choice of water versus either 10% or 20% sucrose and/or 4% or 18% casein in 13-week old male WT mice receiving daily i.p. injections of vehicle (4 days), followed by daily i.p. injections of FGF21 (1 mg/kg; 4 days), and then a washout period with no injections (3 days; n = 8/group). (D) Average daily carbohydrate caloric intake from food alone during 3-bottle choice of water versus either 10% or 20% sucrose and/or 4% or 18% casein in 13-week old male WT mice receiving daily i.p. injections of vehicle (4 days), followed by daily i.p. injections of FGF21 (1 mg/kg; 4 days), and then a washout period with no injections (3 days; n = 8/group). (E) Average daily protein caloric intake from casein alone during 3-bottle choice of water versus either 10% or 20% sucrose and/or 4% or 18% casein in 13-week old male WT mice receiving daily i.p. injections of vehicle (4 days), followed by daily i.p. injections of FGF21 (1 mg/kg; 4 days), and then a washout period with no injections (3 days; n = 8/group). (F) Average daily carbohydrate caloric intake from sucrose alone during 3-bottle choice of water versus either 10% or 20% sucrose and/or 4% or 18% casein in 13-

week old male WT mice receiving daily i.p. injections of vehicle (4 days), followed by daily i.p. injections of FGF21 (1 mg/kg; 4 days), and then a washout period with no injections (3 days; n = 8/group). Values are mean +/- SEM. 2-way ANOVA with Holm-Sidak's multiple comparisons test performed for all panels with vehicle treatment used as the control condition for statistical comparisons, \* =  $P < 0.05$ .

**Supplementary Figure 2. Increased food intake associated with dietary protein dilution is blocked in mice lacking functional FGF21 signaling to glutamatergic neurons without altering water consumption or plasma lipid levels.** (A) Weekly food intake on high fat diet (HFD) or high fat, low protein (HFLP) in wild type (WT) and mice lacking  $\beta$ -klotho in Vglut2-expressing cells (KLB Vglut2-KO mice) over 5 weeks (n = 11-15 mice/group). (B) Weekly food intake on HFD or HFLP in WT mice and mice lacking KLB in Vgat-expressing cells (KLB Vgat-KO mice) over 5 weeks (n = 8-10 mice/group). (C) Average daily water consumption measured in metabolic chambers in WT and KLB Vglut2-KO mice on HFD or HFLP for 5 weeks (n = 8 mice/group). (D) Serum triglyceride levels measured in WT and KLB Vglut2-KO mice on HFD or HFLP after 5 weeks on the respective diets (n = 8 mice/group). (E) Serum cholesterol levels measured in WT and KLB Vglut2-KO mice on HFD or HFLP after 5 weeks on the respective diets (n = 8 mice/group). (F) Plasma glucose levels during an insulin tolerance test (ITT) in WT mice and KLB Vgat-KO mice on HFD or HFLP for 5 weeks (n = 6-8 mice/group). Values are mean +/- SEM. 2-way ANOVA with Holm-Sidak's multiple comparisons test performed for all panels with mice on HFD used as the control condition within genotypes for statistical comparisons, \* =  $P < 0.05$ .

**Supplementary Table 1. Composition of diets related to Methods.** Composition of all diets for animal studies are as indicated.

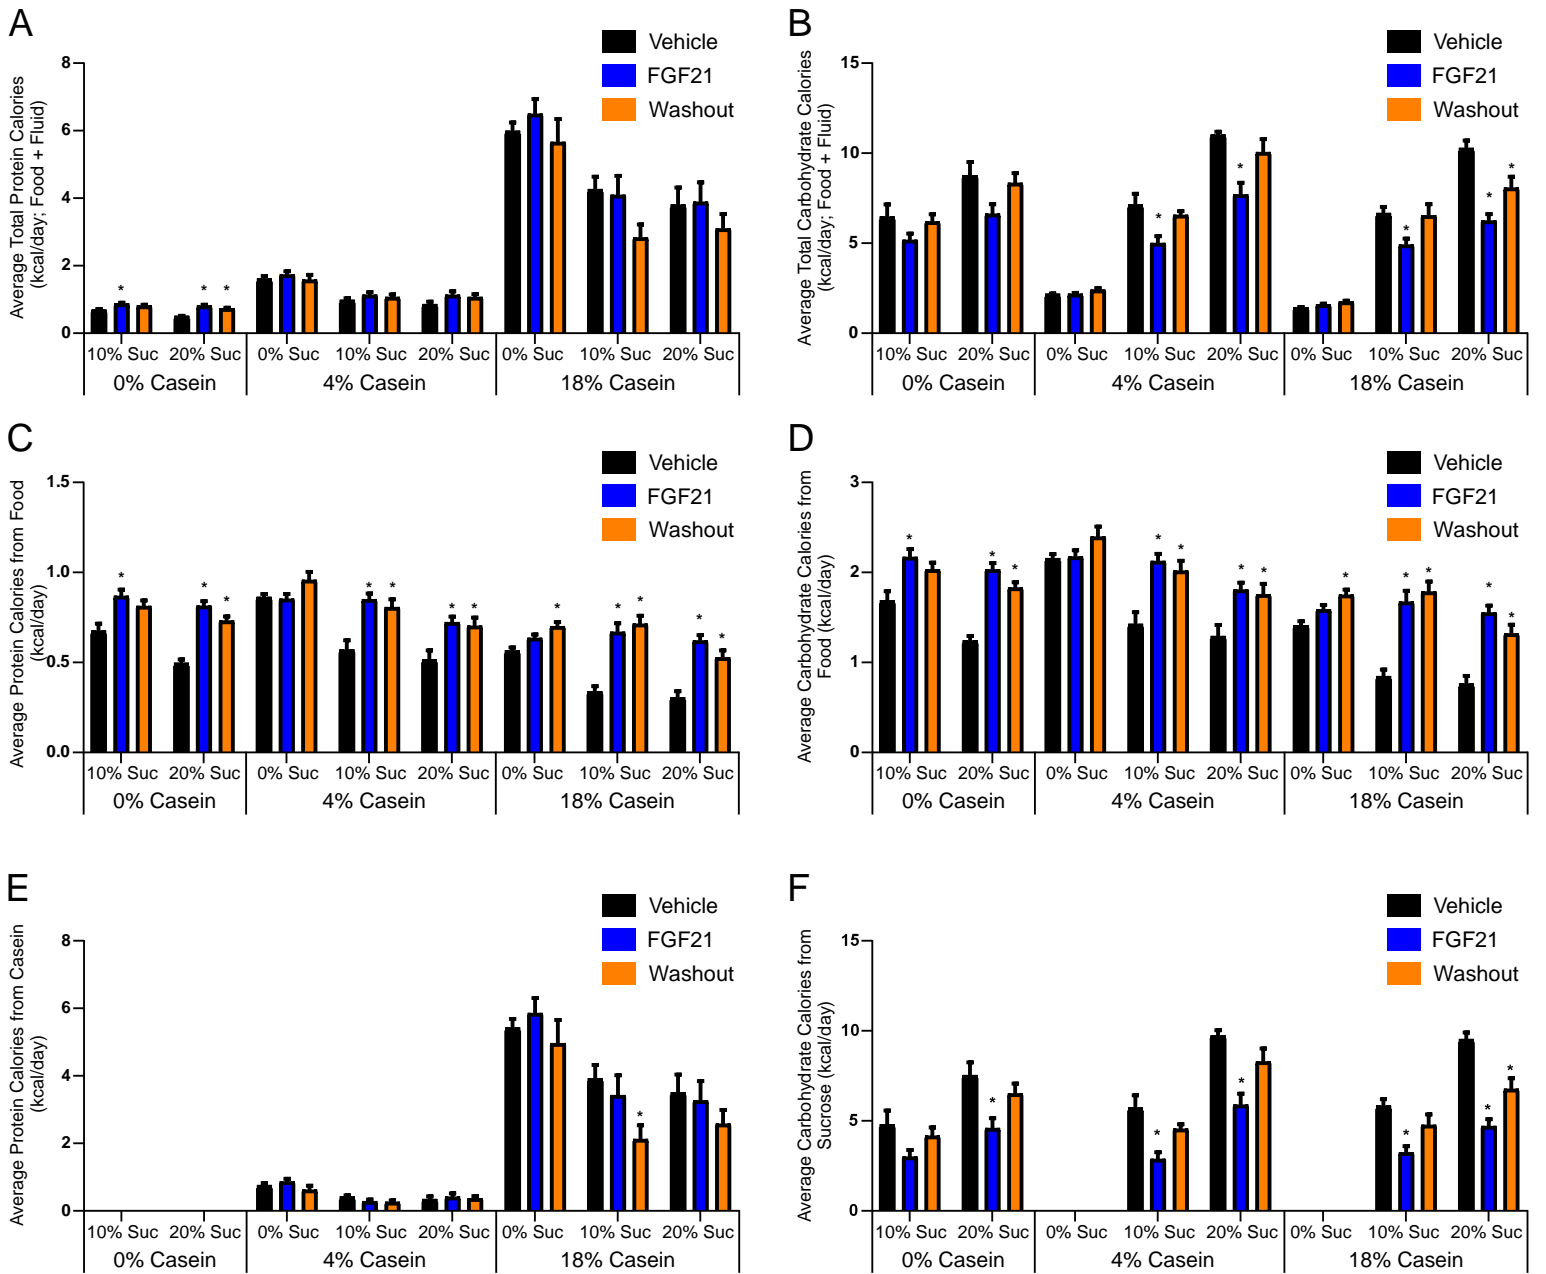

Supplementary Figure 1

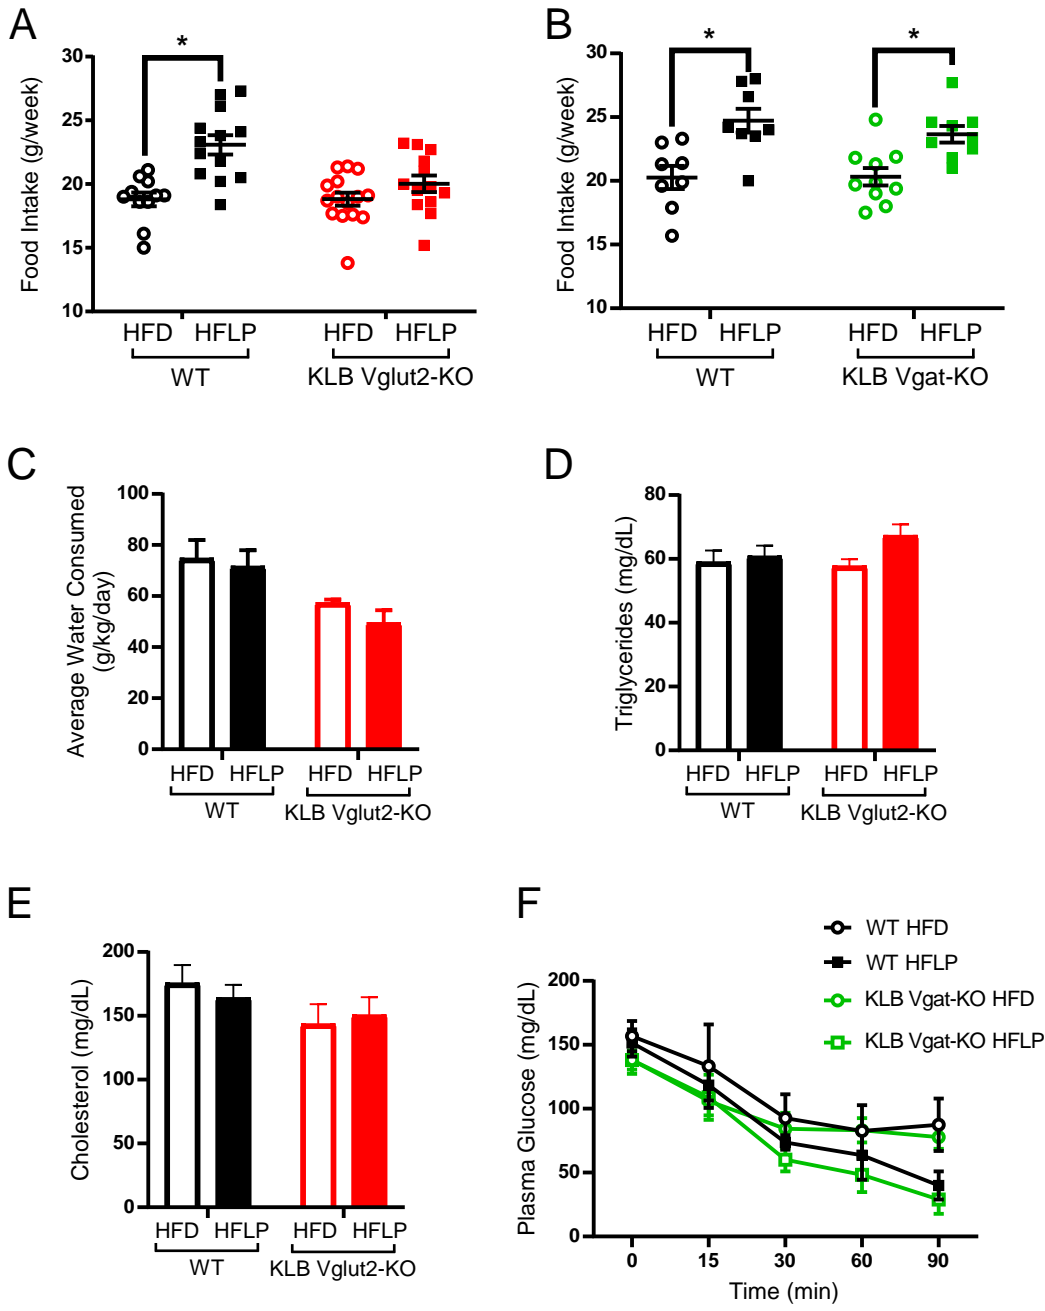

Supplementary Figure 2

**Supplemental Table 1. Composition of diets related to methods.**

| <b>D12450B</b>           |                                        |              |                             | <b>D12492</b>            |                                      |              |                             |
|--------------------------|----------------------------------------|--------------|-----------------------------|--------------------------|--------------------------------------|--------------|-----------------------------|
| <b>Class description</b> | <b>Ingredients</b>                     | <b>Grams</b> | <b>Caloric Information</b>  | <b>Class description</b> | <b>Ingredients</b>                   | <b>Grams</b> | <b>Caloric Information</b>  |
| Protein                  | Casein, Lactic, 30 Mesh                | 200.00 g     | Protein: 20 % Kcal          | Protein                  | Casein, Lactic, 30 Mesh              | 200.00 g     | Protein: 20 % Kcal          |
| Protein                  | Cystine, L                             | 3.00 g       | Fat: 10 % Kcal              | Protein                  | Cystine, L                           | 3.00 g       | Fat: 60 % Kcal              |
| Carbohydrate             | Sucrose, Fine Granulated               | 354.00 g     | Carbohydrate: 70 % Kcal     | Carbohydrate             | Lodex 10                             | 125.00 g     | Carbohydrate: 20 % Kcal     |
| Carbohydrate             | Starch, Corn                           | 315.00 g     | Energy density: 3.82 Kcal/g | Carbohydrate             | Sucrose, Fine Granulated             | 72.80 g      | Energy density: 5.21 Kcal/g |
| Carbohydrate             | Lodex 10                               | 35.00 g      |                             | Fiber                    | Solka Floc, FCC200                   | 50.00 g      |                             |
| Fiber                    | Solka Floc, FCC200                     | 50.00 g      |                             | Fat                      | Lard                                 | 245.00 g     |                             |
| Fat                      | Soybean Oil, USP                       | 25.00 g      |                             | Fat                      | Soybean Oil, USP                     | 25.00 g      |                             |
| Fat                      | Lard                                   | 20.00 g      |                             | Mineral                  | S10026B                              | 50.00 g      |                             |
| Mineral                  | S10026B                                | 50.00 g      |                             | Vitamin                  | Choline Bitartrate                   | 2.00 g       |                             |
| Vitamin                  | Choline Bitartrate                     | 2.00 g       |                             | Vitamin                  | V10001C                              | 1.00 g       |                             |
| Vitamin                  | V10001C                                | 1.00 g       |                             | Dye                      | Dye, Blue FD&C #1, Alum. Lake 35-42% | 0.05 g       |                             |
| Dye                      | Dye, Yellow FD&C #5, Alum. Lake 35-42% | 0.05 g       |                             |                          |                                      |              |                             |
|                          |                                        |              |                             |                          |                                      |              |                             |
| <b>D10062201</b>         |                                        |              |                             | <b>D12020703</b>         |                                      |              |                             |
| <b>Class description</b> | <b>Ingredients</b>                     | <b>Grams</b> | <b>Caloric Information</b>  | <b>Class description</b> | <b>Ingredients</b>                   | <b>Grams</b> | <b>Caloric Information</b>  |
| Protein                  | Casein, Lactic, 30 Mesh                | 50.00 g      | Protein: 5 % Kcal           | Protein                  | Casein, Lactic, 30 Mesh              | 50.00 g      | Protein: 5 % Kcal           |
| Protein                  | Cystine, L                             | 3.00 g       | Fat: 10 % Kcal              | Protein                  | Cystine, L                           | 3.00 g       | Fat: 60 % Kcal              |
| Carbohydrate             | Sucrose, Fine Granulated               | 354.00 g     | Carbohydrate: 85 % Kcal     | Carbohydrate             | Lodex 10                             | 325.00 g     | Carbohydrate: 35 % Kcal     |
| Carbohydrate             | Starch, Corn                           | 315.00 g     | Energy density: 3.82 Kcal/g | Carbohydrate             | Sucrose, Fine Granulated             | 72.80 g      | Energy density: 5.21 Kcal/g |
| Carbohydrate             | Lodex 10                               | 185.00 g     |                             | Fiber                    | Solka Floc, FCC200                   | 50.00 g      |                             |
| Fiber                    | Solka Floc, FCC200                     | 50.00 g      |                             | Fat                      | Lard                                 | 245.00 g     |                             |
| Fat                      | Soybean Oil, USP                       | 25.00 g      |                             | Fat                      | Soybean Oil, USP                     | 25.00 g      |                             |
| Fat                      | Lard                                   | 20.00 g      |                             | Mineral                  | S10026B                              | 50.00 g      |                             |
| Mineral                  | S10026B                                | 50.00 g      |                             | Vitamin                  | Choline Bitartrate                   | 2.00 g       |                             |
| Vitamin                  | Choline Bitartrate                     | 2.00 g       |                             | Vitamin                  | V10001C                              | 1.00 g       |                             |
| Vitamin                  | V10001C                                | 1.00 g       |                             | Dye                      | Dye, Red FD&C #40, Alum. Lake 35-42% | 0.05 g       |                             |
| Dye                      | Dye, Red FD&C #40, Alum. Lake 35-42%   | 0.05 g       |                             |                          |                                      |              |                             |
|                          |                                        |              |                             |                          |                                      |              |                             |
|                          |                                        |              |                             |                          |                                      |              |                             |
| <b>Teklad 2920x</b>      |                                        |              |                             |                          |                                      |              |                             |
|                          | <b>Caloric Information</b>             |              |                             |                          |                                      |              |                             |
| Protein:                 | 19.1 % Kcal                            |              |                             |                          |                                      |              |                             |
| Fat:                     | 6.5 % Kcal                             |              |                             |                          |                                      |              |                             |
| Carbohydrate:            | 47 % Kcal                              |              |                             |                          |                                      |              |                             |
| Crude Fiber:             | 2.7 % Kcal                             |              |                             |                          |                                      |              |                             |
| Neutral Detergent Fiber: | 12.3% Kcal                             |              |                             |                          |                                      |              |                             |
| Ash:                     | 5.1 % Kcal                             |              |                             |                          |                                      |              |                             |
| Energy density:          | 3.10 Kcal/g                            |              |                             |                          |                                      |              |                             |
